# Supplementary material for: Exosomal FZD-7 Expression Is Modulated by Different Lifestyle Interventions in Patients with NAFLD
Source: MDPI journal article supplement (doi:10.3390/nu14061133), 2022-03-08
Supplement: s1 [file s1]

*Supplementary Information*

# Exosomal FZD-7 Expression Is Modulated by Different Lifestyle Interventions in Patients with NAFLD

Maria Principia Scavo<sup>1\*</sup>, Nicoletta Depalo<sup>2\*</sup>, Federica Rizzi<sup>2,3</sup>, Livianna Carrieri<sup>1</sup>, Grazia Serino<sup>4</sup>, Isabella Franco<sup>5</sup>, Caterina Bonfiglio<sup>5</sup>, Pasqua Letizia Pesole<sup>6</sup>, Raffaele Cozzolongo<sup>7</sup>, Vito Gianuzzi<sup>7</sup>, Maria Lucia Curri<sup>2,3</sup>, Alberto Ruben Osella<sup>5§</sup> and Gianluigi Giannelli<sup>8§</sup>

**Table S1.** Post-estimation analysis by using Bonferroni Test, show statistical significative decrease value for CAP

| DIET                         | $\beta$ | SE     | 95%CI           |
|------------------------------|---------|--------|-----------------|
| (Control#1)vs(Control#0)     | -0.82   | (1.27) | (-5.35;3.71)    |
| (LGIMD#1) vs (LGIMD#0)       | -9.35   | (1.46) | (-14.57; -4.12) |
| (PA1#1) vs (PA1#0)           | -9.16   | (1.46) | (-14.39; -3.93) |
| (PA2#1) vs (PA2#0)           | -10.05  | (1.71) | (-16.16; -3.95) |
| (LGIMD+PA1#1)vs(LGIMD+PA1#0) | -8.59   | (1.42) | (-13.65; -3.53) |
| (LGIMD+PA2#1)vs(LGIMD+PA2#0) | -12.62  | (1.46) | (-17.85; -7.39) |

**Table S2:** Adherence to physical activity programs by working arm, gender and week from enrollment. NutriAtt Trial, Castellana Grotte 2015-2016

|       |           | PA1 <sup>a</sup> |              | PA2 <sup>b</sup> |             | LGIMD+PA1 <sup>c</sup> |              | LGIMD+PA2 <sup>d</sup> |             |
|-------|-----------|------------------|--------------|------------------|-------------|------------------------|--------------|------------------------|-------------|
|       |           | Male             | Female       | Male             | Female      | Male                   | Female       | Male                   | Female      |
| Weeks |           | Mean (SD)        | Mean (SD)    | Mean (SD)        | Mean (SD)   | Mean (SD)              | Mean (SD)    | Mean (SD)              | Mean (SD)   |
| 3     | Time      | 96.5 (9.70)      | 100 (0)      | 100 (0)          | 100 (0)     | 97.8 (8.60)            | 93.7 (12.40) | 100 (0)                | 100 (0)     |
|       | Intensity | 101.6 (3.81)     | 100.5 (1.54) | 100.1 (0.61)     | 100 (0)     | 99.9 (1.22)            | 100 (0)      | 99.9 (0.45)            | 99.4 (2.41) |
|       | Load      | N/A*             | N/A*         | 100 (0)          | 100 (0)     | N/A*                   | N/A*         | 10 (0)                 | 100 (0)     |
| 4     | Time      | 92.4 (15.8)      | 89.6 (19.8)  | 100 (0)          | 100 (0)     | 100 (0)                | 100 (0)      | 100 (0)                | 97.4 (9.24) |
|       | Intensity | 101.5 (3.20)     | 100.5 (1.54) | 100.1 (0.61)     | 100 (0)     | 100.3 (0.63)           | 100 (0)      | 99.9 (0.51)            | 99.4 (2.41) |
|       | Load      | N/A*             | N/A*         | 100 (0)          | 100 (0)     | N/A*                   | N/A*         | 100 (0)                | 100 (0)     |
| 5     | Time      | 94.4 (12.9)      | 95.8 (11.8)  | 95.8 (11.4)      | 94.4 (13.6) | 100 (0)                | 100 (0)      | 100 (0)                | 94.9 (12.5) |
|       | Intensity | 101.0 (2.32)     | 100.1 (0.28) | 100.1 (0.61)     | 100 (0)     | 100.6 (1.56)           | 100 (0)      | 100.1 (0.40)           | 98.9 (2.81) |
|       | Load      | N/A*             | N/A*         | 100 (0)          | 100 (0)     | N/A*                   | N/A*         | 100 (0)                | 100 (0)     |
| 6     | Time      | 94.2 (11.5)      | 100 (0)      | 93.7 (13.4)      | 94.4 (13.6) | 100 (0)                | 100 (0)      | 100 (0)                | 97.4 (9.24) |
|       | Intensity | 100.5 (3.07)     | 100.1 (0.28) | 99.9 (0.41)      | 100 (0)     | 100.9 (1.84)           | 100 (0)      | 100.1 (0.40)           | 98.9 (2.81) |
|       | Load      | N/A*             | N/A*         | 100 (0)          | 100 (0)     | N/A*                   | N/A*         | 100 (0)                | 100 (0)     |
| 7     | Time      | 93.0 (13.2)      | 92.0 (22.6)  | 95.8 (11.4)      | 94.4 (13.6) | 97.8 (8.60)            | 87.5 (24.8)  | 100.0 (0)              | 92.3 (20.0) |
|       | Intensity | 100.6 (1.53)     | 100.1 (0.28) | 100 (0)          | 100 (0)     | 100.5 (1.03)           | 100.0 (0)    | 100.1 (0.40)           | 98.9 (2.81) |
|       | Load      | N/A*             | N/A*         | 100 (0)          | 100 (0)     | N/A*                   | N/A*         | 100 (0)                | 100 (0)     |
| 8     | Time      | 88.2 (19.3)      | 91.7 (15.4)  | 95.8 (16.7)      | 100 (0)     | 100 (0)                | 83.3 (27.9)  | 100 (0)                | 97.4 (9.24) |
|       | Intensity | 100.5 (1.66)     | 100.1 (0.28) | 100 (0)          | 100 (0)     | 100.6 (1.08)           | 100 (0)      | 100.1 (0.40)           | 98.9 (2.81) |
|       | Load      | N/A*             | N/A*         | 100 (0)          | 100 (0)     | N/A*                   | N/A*         | 100 (0)                | 100 (0)     |
| 9     | Time      | 93.4 (16.1)      | 94.8 (11.7)  | 93.3 (13.8)      | 91.7 (16.7) | 97.4 (9.24)            | 88.9 (17.2)  | 97.9 (8.33)            | 97.4 (9.24) |
|       | Intensity | 99.6 (1.26)      | 100 (0)      | 100.2 (0.73)     | 100 (0)     | 100.1 (1.07)           | 100 (0)      | 100.2 (0.79)           | 98.6 (3.43) |
|       | Load      | N/A*             | N/A*         | 100 (0)          | 100 (0)     | N/A*                   | N/A*         | 100 (0)                | 100 (0)     |
| 10    | Time      | 98.4 (5.09)      | 84.5 (19.5)  | 93.3 (13.8)      | 91.7 (16.7) | 97.4 (9.24)            | 94.4 (13.6)  | 97.9 (8.33)            | 94.8 (12.5) |

<sup>a</sup>PA1: Physical Activity 1 based on the Aerobic Activity Program; <sup>b</sup>PA2: Physical Activity 2 based on the combination of Aerobic Activity Program and Resistance Training; <sup>c</sup>PA1+LGIMD: Low Glycemic Index Mediterranean Diet; <sup>d</sup>PA2+LGIMD: Low Glycemic Index Mediterranean Diet; \*N/A= Not Applicable

**Table S3:** Mediterranean adequacy Index by Gender, Age and week. NutriAtt trial. Castellana Grotte, 2015-2016

| Age (yrs) | Diet              | Male           |                 |                | Female          |                 |                 |
|-----------|-------------------|----------------|-----------------|----------------|-----------------|-----------------|-----------------|
|           |                   | 3rd week       | 6th week        | 9th week       | 3rd week        | 6th week        | 9th week        |
|           |                   | Median (IQR)   | Median (IQR)    | Median (IQR)   | Median (IQR)    | Median (IQR)    | Median (IQR)    |
| <40       | CD <sup>a</sup>   | 2.3 (0.9;12.5) | 2.3 (0.9;12.5)  | 3.5 (0.9;12.5) | 7.8 (0.9;8.5)   | 7.8 (0.9;8.5)   | 0.9 (0.9;8.5)   |
|           | LGMD <sup>b</sup> | 4.6 (1.8;25.1) | 4.6 (1.8;25.1)  | 6.9 (1.8;25.1) | 15.7 (1.8;17.0) | 15.7 (1.8;17.0) | 1.9 (1.8;17.0)  |
| 40-49     | CD <sup>a</sup>   | 4.7 (2.0;9.4)  | 4.7 (2.6;15.2)  | 4.9 (2.6;15.2) | 2.1 (0.9;3.3)   | 2.1 (0.9;3.3)   | 2.1 (1.6;3.3)   |
|           | LGMD <sup>b</sup> | 9.5 (4.0;18.8) | 9.5 (5.7;30.5)  | 9.7 (5.7;30.5) | 3.6 (1.9;6.5)   | 3.6 (1.9;6.5)   | 3.6 (3.2;6.5)   |
| ≥50       | CD <sup>a</sup>   | 4.7 (3.4;12.3) | 5.2 (3.4;12.4)  | 4.7 (3.7;12.4) | 5.9 (3.6;9.6)   | 5.9 (3.6;9.6)   | 5.9 (3.6;9.0)   |
|           | LGMD <sup>b</sup> | 9.4 (5.8;24.6) | 10.5 (5.4;26.4) | 9.4 (5.8;26.4) | 11.8 (7.4;19.1) | 11.8 (7.4;19.1) | 11.8 (7.4; 7.9) |

<sup>a</sup>CD: Control Diet based on CREA-AN guidelines; <sup>b</sup>LGMD: Low Glycemic Index Mediterranean Diet

**Table S4:** Main characteristics of participants by intervention arm and time. NutriAtt trial, Castellana Grotte 2015-2016

|                                                    | Control        | <sup>a</sup> CD | <sup>b</sup> LGIMD | <sup>c</sup> PA1 | <sup>d</sup> PA2 | <sup>e</sup> LGIMD+PA1 | <sup>f</sup> LGIMD+PA2 | <i>p-value</i> |
|----------------------------------------------------|----------------|-----------------|--------------------|------------------|------------------|------------------------|------------------------|----------------|
| N                                                  | 20             | 16              | 17                 | 16               | 14               | 16                     | 16                     |                |
| Age at Enrollment (yrs) <sup>g</sup>               | 45.35 (16.38)  | 53.63 (8.81)    | 56.82 (9.58)       | 53.44 (9.56)     | 45.79 (9.82)     | 49.31 (9.49)           | 50.25 (11.00)          | 0.029          |
| Age (categorical, yrs) <sup>g</sup>                |                |                 |                    |                  |                  |                        |                        |                |
| <40                                                | 8 (40%)        | 0 (0%)          | 0 (0%)             | 2 (13%)          | 4 (29%)          | 2 (13%)                | 3 (19%)                | 0.003          |
| 40-49                                              | 4 (20%)        | 7 (44%)         | 3 (18%)            | 2 (13%)          | 6 (43%)          | 9 (56%)                | 5 (31%)                |                |
| ≥50                                                | 8 (40%)        | 9 (56%)         | 14 (82%)           | 12 (75%)         | 4 (29%)          | 5 (31%)                | 8 (50%)                |                |
| Sex <sup>h</sup>                                   |                |                 |                    |                  |                  |                        |                        |                |
| Male                                               | 10 (50%)       | 7 (44%)         | 10 (59%)           | 9 (56%)          | 9 (64%)          | 9 (56%)                | 11 (69%)               | 0.84           |
| Female                                             | 10 (50%)       | 9 (56%)         | 7 (41%)            | 7 (44%)          | 5 (36%)          | 7 (44%)                | 5 (31%)                |                |
| Smoke <sup>h</sup>                                 |                |                 |                    |                  |                  |                        |                        |                |
| Never/Former                                       | 16 (80%)       | 12 (92%)        | 12 (80%)           | 11 (79%)         | 7 (64%)          | 11 (85%)               | 10 (83%)               | 0.76           |
| Current                                            | 4 (20%)        | 1 (8%)          | 3 (20%)            | 3 (21%)          | 4 (36%)          | 2 (15%)                | 2 (17%)                |                |
| Education <sup>h</sup>                             |                |                 |                    |                  |                  |                        |                        |                |
| Primary School                                     | 4 (20%)        | 0 (0%)          | 2 (13%)            | 3 (21%)          | 5 (45%)          | 5 (38%)                | 3 (23%)                | 0.15           |
| Secondary School                                   | 3 (15%)        | 0 (0%)          | 1 (7%)             | 0 (0%)           | 0 (0%)           | 1 (8%)                 | 0 (0%)                 |                |
| High School                                        | 4 (20%)        | 7 (54%)         | 6 (40%)            | 4 (29%)          | 1 (9%)           | 1 (8%)                 | 2 (15%)                |                |
| Graduate                                           | 9 (45%)        | 6 (46%)         | 6 (40%)            | 7 (50%)          | 5 (45%)          | 6 (46%)                | 8 (62%)                |                |
| Marital Status <sup>h</sup>                        |                |                 |                    |                  |                  |                        |                        |                |
| Single                                             | 7 (35%)        | 1 (8%)          | 0 (0%)             | 1 (7%)           | 2 (20%)          | 2 (15%)                | 1 (8%)                 | 0.11           |
| Married/Coupled                                    | 12 (60%)       | 12 (92%)        | 14 (100%)          | 13 (93%)         | 8 (80%)          | 9 (69%)                | 10 (83%)               |                |
| Separated/Divorced                                 | 1 (5%)         | 0 (0%)          | 0 (0%)             | 0 (0%)           | 0 (0%)           | 2 (15%)                | 1 (8%)                 |                |
| Diabetes <sup>h</sup>                              |                |                 |                    |                  |                  |                        |                        |                |
| No                                                 | 17 (89%)       | 14 (100%)       | 12 (80%)           | 15 (94%)         | 13 (100%)        | 9 (69%)                | 11 (92%)               | 0.11           |
| Yes                                                | 2 (11%)        | 0 (0%)          | 3 (20%)            | 1 (6%)           | 0 (0%)           | 4 (31%)                | 1 (8%)                 |                |
| Dyslipidemia <sup>h</sup>                          |                |                 |                    |                  |                  |                        |                        |                |
| No                                                 | 17 (89%)       | 10 (71%)        | 8 (53%)            | 12 (75%)         | 10 (77%)         | 12 (86%)               | 9 (75%)                | 0.32           |
| Yes                                                | 2 (11%)        | 4 (29%)         | 7 (47%)            | 4 (25%)          | 3 (23%)          | 2 (14%)                | 3 (25%)                |                |
| Hypertension <sup>h</sup>                          |                |                 |                    |                  |                  |                        |                        |                |
| No                                                 | 16 (84%)       | 10 (71%)        | 6 (40%)            | 10 (63%)         | 10 (77%)         | 10 (71%)               | 7 (58%)                | 0.18           |
| Yes                                                | 3 (16%)        | 4 (29%)         | 9 (60%)            | 6 (38%)          | 3 (23%)          | 4 (29%)                | 5 (42%)                |                |
| <sup>g</sup> Ratiofzd7 <sup>g</sup>                |                |                 |                    |                  |                  |                        |                        |                |
| Baseline                                           | 11.58 (2.51)   | 24.48 (7.71)    | 23.73 (5.87)       | 23.53 (5.74)     | 24.70 (6.45)     | 20.63 (6.48)           | 25.04 (7.69)           | <0.001         |
| Three months                                       | 10.76 (2.97)   | 14.22 (7.10)    | 14.19 (5.66)       | 14.51 (5.80)     | 14.45 (7.44)     | 12.04 (5.66)           | 12.40 (3.70)           | 0.30           |
| <sup>h</sup> DBP (mmHg) <sup>g</sup>               |                |                 |                    |                  |                  |                        |                        |                |
| Baseline                                           | 116.50 (17.25) | 124.69 (12.58)  | 131.56 (21.27)     | 122.50 (10.00)   | 116.15 (10.44)   | 124.06 (14.52)         | 129.38 (17.31)         | 0.038          |
| Three months                                       | 114.00 (14.65) | 119.55 (6.50)   | 123.08 (13.16)     | 120.00 (7.56)    | 113.00 (9.49)    | 117.50 (10.87)         | 123.00 (14.37)         | 0.19           |
| <sup>h</sup> SBP (mmHg) <sup>g</sup>               |                |                 |                    |                  |                  |                        |                        |                |
| Baseline                                           | 76.75 (7.66)   | 80.63 (9.46)    | 84.06 (11.14)      | 79.06 (5.23)     | 78.46 (4.27)     | 80.63 (6.02)           | 84.38 (7.27)           | 0.041          |
| Three months                                       | 77.65 (5.80)   | 79.09 (7.01)    | 77.69 (10.92)      | 81.25 (6.41)     | 77.00 (6.75)     | 79.00 (6.15)           | 80.67 (6.78)           | 0.77           |
| Weight (Kg) <sup>g</sup>                           |                |                 |                    |                  |                  |                        |                        |                |
| Baseline                                           | 66.89 (15.44)  | 91.46 (14.00)   | 89.35 (13.55)      | 87.00 (14.16)    | 90.15 (8.60)     | 91.00 (14.31)          | 102.64 (20.05)         | <0.001         |
| Three months                                       | 66.55 (14.92)  | 88.67 (15.32)   | 85.88 (13.55)      | 84.76 (13.85)    | 88.55 (8.38)     | 85.94 (12.85)          | 95.69 (19.10)          | <0.001         |
| <sup>h</sup> BMI (kg/m <sup>2</sup> ) <sup>g</sup> |                |                 |                    |                  |                  |                        |                        |                |
| Baseline                                           | 23.86 (4.56)   | 33.47 (4.52)    | 32.49 (4.00)       | 31.28 (3.24)     | 31.36 (3.49)     | 33.96 (4.53)           | 35.80 (5.66)           | <0.001         |
| Three months                                       | 23.86 (4.56)   | 31.88 (4.84)    | 30.28 (4.22)       | 30.02 (3.38)     | 30.75 (3.68)     | 32.45 (4.00)           | 33.38 (5.31)           | <0.001         |
| Triglycerides (mmol/L) <sup>g</sup>                |                |                 |                    |                  |                  |                        |                        |                |
| Baseline                                           | 0.73 (0.44)    | 1.04 (0.45)     | 1.62 (1.11)        | 1.65 (1.10)      | 1.27 (0.69)      | 1.74 (1.21)            | 1.53 (0.73)            | 0.005          |
| Three months                                       | 0.69 (0.36)    | 0.93 (0.28)     | 1.42 (0.81)        | 1.58 (0.55)      | 1.23 (0.65)      | 1.18 (0.57)            | 1.01 (0.42)            | <0.001         |
| Total Cholesterol (mmol/L) <sup>g</sup>            |                |                 |                    |                  |                  |                        |                        |                |
| Baseline                                           | 4.36 (0.51)    | 5.17 (1.14)     | 5.19 (1.34)        | 4.93 (0.98)      | 5.18 (1.05)      | 5.35 (1.02)            | 5.01 (0.90)            | 0.085          |
| Three months                                       | 4.16 (0.52)    | 5.16 (0.78)     | 4.73 (1.12)        | 5.31 (0.78)      | 5.39 (1.08)      | 4.94 (1.13)            | 4.68 (1.01)            | 0.008          |

<sup>a</sup>CD: Control Diet based on CREA-AN guidelines; <sup>b</sup>LGIMD: Low Glycemic Index Mediterranean Diet; <sup>c</sup>PA1: Physical Activity 1 based on the Aerobic Activity Program; <sup>d</sup>PA2: Physical Activity 2 based on the combination of Aerobic Activity Program and Resistance Training; <sup>e</sup>PA1+LGIMD; <sup>f</sup>PA2+LGIMD; <sup>g</sup>Ratiofzd7<sup>g</sup>: <sup>h</sup>DBP: Diastolic Blood Pressure; <sup>i</sup>SBP: Systolic Blood Pressure; <sup>j</sup>BMI: Body Mass Index; <sup>k</sup>HDL: High Density Lipoprotein Cholesterol; <sup>l</sup>ALT: Alanine Aminotransferase; <sup>m</sup>AST: Aspartate Aminotransferase; <sup>n</sup>HOMA-IR: Homeostasis model assessment for insulin resistance; <sup>o</sup>CAP: Controlled Attenuation Parameter FibroScan®; Cells reporting subject characteristics contain <sup>g</sup> Mean±(SD). <sup>h</sup>Number. (Percentage) Percentages calculated per column <sup>g</sup>Median (IQR)

## Brochure of prescribed diets

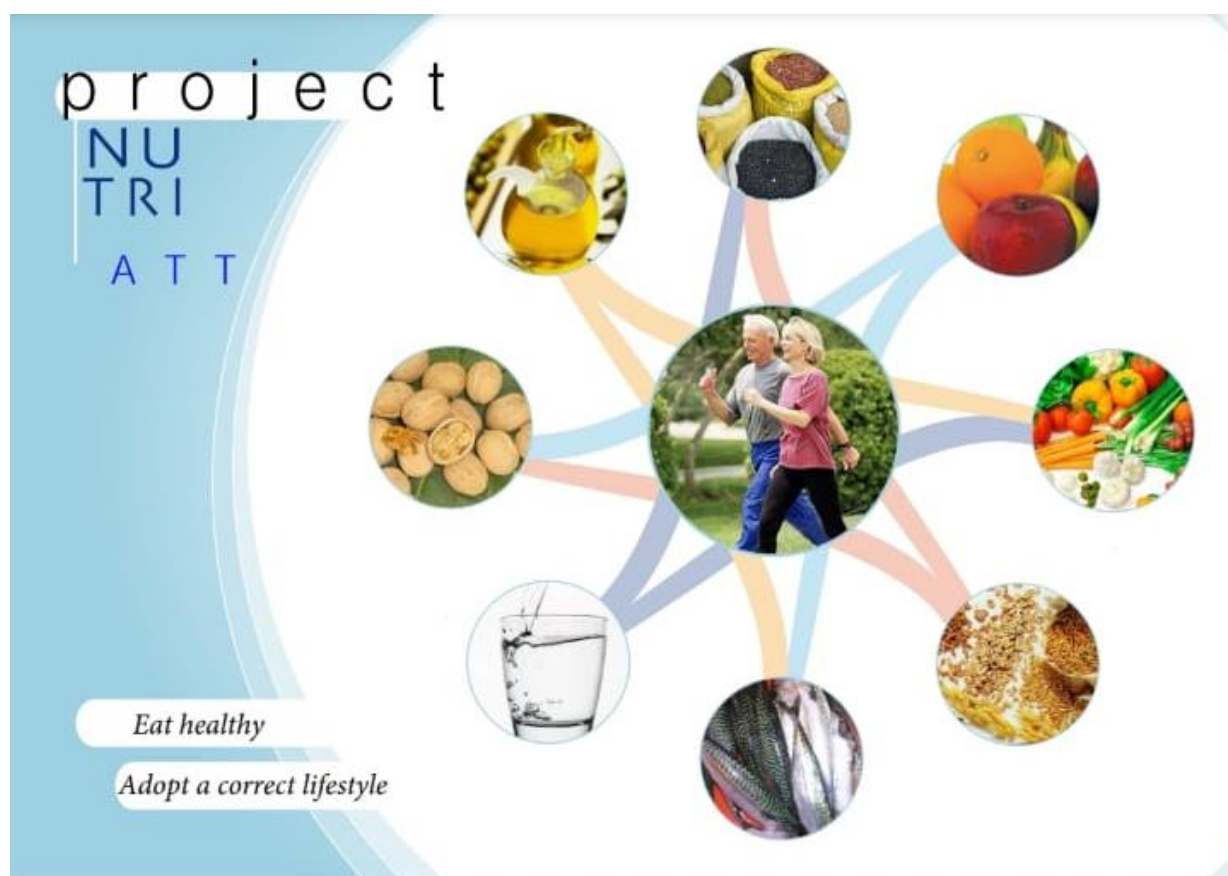

## Introduction

Your health is in your hands; you build it each day when you go to the supermarket and choose one food rather than another one, when you cook a lunch or a dinner. In these moments you do dietary choices which influence your health. A wrong diet can determine the appearance of risk factors for cardiovascular diseases and cancer. One of the steps of these diseases is the Non-alcoholic Fatty Liver Disease (NAFLD) (fat liver).

We found that your clinical, laboratory and instrumental data, which came from the NutriEP study you participate in, evidenced that you have NAFLD and then you are at a greater risk to develop cardiovascular disease or tumors (the principal causes of death in Western World).

The Laboratory of Epidemiology and Biostatistics of the IRCCS Saverio de Bellis from Castellana Grotte (Bari) has started up the research project "NutriEpa: EFFECT OF A LOW GLYCEMIC INDEX MEDITERRANEAN DIET ON NON ALCOHOLIC FATTY LIVER DISEASE. A RANDOMIZED CONTROLLED CLINICAL TRIAL" to evaluate the efficacy of the best diet to treat NAFLD.

So, we invite you to participate in this project which will help us to understand the efficacy of the diet to treat NAFLD. Dietary advices described in the following pages are those of Low Glycemic Index Mediterranean Diet and we ask you to follow them. Furthermore we ask you to record your daily diet in this dietary record as long as the duration of the study. This will permit us to measure adherence level to the diet we gave you.

# WATCH THE SEMAPHORE!

## CHECK YOUR DIETARY CHOICES

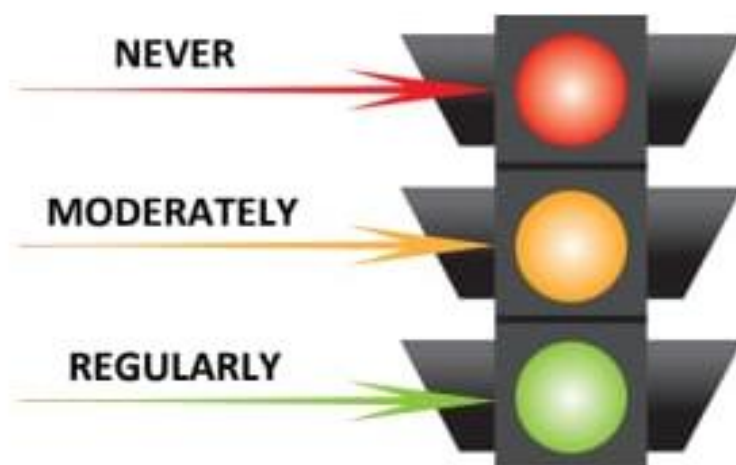

Foods choice and the frequency of their consumption is fundamental to set a correct dietary program, which day after day should be followed by everyone to keep a satisfying state of health. To direct foods choice towards those which best represent the **LOW GLYCAEMIC INDEX MEDITERRANEAN DIET**, we marked with **GREEN** colour the foods to consume regularly, with **YELLOW** those to consume moderately and with **RED** those to avoid completely.

| REGULARLY                                                                                                                                                                                                                                                                                                                                                                                                                                                                                                                                                                                                                                                                                                                                                                                                                                                                                                                   | MODERATELY                                                                                                                                                                                                                                                                                                                                                                                           | max                                                                                                                                                                                                                                                                                           | NEVER                                                                                                                                                                                                                                                                                                                                                                                                                                                                                                                                                                                                                                                                                                                                                                                                                                                                                                                                            |
|-----------------------------------------------------------------------------------------------------------------------------------------------------------------------------------------------------------------------------------------------------------------------------------------------------------------------------------------------------------------------------------------------------------------------------------------------------------------------------------------------------------------------------------------------------------------------------------------------------------------------------------------------------------------------------------------------------------------------------------------------------------------------------------------------------------------------------------------------------------------------------------------------------------------------------|------------------------------------------------------------------------------------------------------------------------------------------------------------------------------------------------------------------------------------------------------------------------------------------------------------------------------------------------------------------------------------------------------|-----------------------------------------------------------------------------------------------------------------------------------------------------------------------------------------------------------------------------------------------------------------------------------------------|--------------------------------------------------------------------------------------------------------------------------------------------------------------------------------------------------------------------------------------------------------------------------------------------------------------------------------------------------------------------------------------------------------------------------------------------------------------------------------------------------------------------------------------------------------------------------------------------------------------------------------------------------------------------------------------------------------------------------------------------------------------------------------------------------------------------------------------------------------------------------------------------------------------------------------------------------|
| 1- Raw vegetables (lettuce, tomatoes, cucumbers, celery, carrots, radishes, etc.)<br>2- Steamed or boiled vegetables (beets, turnips, chicory, cauliflower, broccoli, etc.)<br>45- Dried pulses without something else (lentils, chickpeas, beans, broad beans, soybeans)<br>46- Own fresh vegetables without something else (peas, beans, green beans)<br>12- Whole wheat pasta with pulses<br>13- Whole wheat pasta with vegetables<br>18- Brown rice with pulses<br>19- Brown rice with vegetables<br>42- Fish (anchovies, sardines, mackerel, etc.)<br>40- Molluscs and crustaceans<br>43- Cod, swordfish, fresh tuna<br>66- Bass bream salmon<br>44- Canned tuna<br>28- Extra virgin olive oil (raw)<br>5- Unsweetened fresh fruit (apples, pears, oranges, grapefruit, kiwi, peaches, etc.)<br>8- Unsweetened nuts (walnuts, almonds)<br>65- Coffee (without sugar or with artificial sweetener)<br>52- Natural water | 30- Milk and yogurt<br>56- Whole wheat biscuits<br>31- Cheese (parmesano, cheese, etc.)<br>32- Dairy products (cheese, smoked cheese, cottage cheese)<br>33- Eggs<br>34- White meat (chicken, turkey, rabbit)<br>25- Potatoes (boiled only)<br>22- Whole wheat bread<br>15- Whole wheat pasta with simple sauce<br>4- Sugary fruit (bananas, persimmons, grapes)<br>62- Dense pure honey<br>49- wine | 1 time/daily<br><br>1 time/daily (3 biscuits)<br>2 times/weekly<br>2 times/weekly<br>2 times/weekly (1 egg)<br>2 times/weekly<br>1 time/weekly<br>2 times/daily (a slice)<br>2 times/weekly (max 80 gr)<br>1 time/daily (max 1 piece)<br>1 time/daily (a teaspoon)<br>2 times/daily (a glass) | 11- Not whole wheat pasta<br>17- Not whole wheat rice<br>21- White bread<br>53- Crackers, pretzels, bread sticks, bread and breakfast cereals<br>47- Pizza<br>35- Red meat (beef, veal, pork, horse, etc.)<br>36- Canned meat<br>37- Stew<br>38- Sausages (raw or cooked ham, dried beef, bacon, salami, mortadella, etc.)<br>41- Farmed fish<br>26- French fries or baked<br>67- Fry<br>29- Butter, margarine, mayonnaise, cream<br>9- Fruit in syrup and candied fruit<br>7- Sweet dried fruit (dried figs, dried dates, prunes, raisins)<br>63- Sugar<br>60- Candies and chocolates<br>61- Jams<br>57- Cakes, sweets, pastries<br>58- Croissants, pastries and snacks<br>54- Dry biscuits, toasts<br>55- Biscuits, shortbread<br>59- Ice-cream and water ice<br>51- Alcoholic beverages and spirits (brandy, grappa, liqueurs, whiskey)<br>50- Carbonated/Non carbonated soft drinks (orange juice, coca-cola, fruit juice, etc.)<br>48- Beer |

## Your Dietary Record

### Instructions

- It's fundamental to complete the Dietary Record each day immediately after the meal or as soon as possible.
- The Dietary Record is composed of a series of pages, one for each week. In each weekly page, days from Monday to Sunday are divided in breakfast, lunch, dinner and snack.
- Record all the foods you eat and what you drink during the day (Sunday and holidays included).
- Registration consists in taking note, in correspondence to the meal, the identification number of the food/drink or of the food group consumed belonging to the list we enclosed. If the food you ate isn't included in the list, just write its name in the place reserved to the corresponding meal.

### Example:

Here below it is shown an hypothetical day of Mr Rossi's Dietary Record.

After each meal Mr Rossi registered what he ate and drank, so he wrote in the box of the specific meal the corresponding number of the food he consumed (by checking the foods list).

At breakfast he drank a cup of milk and coffee without sugar and he ate an apple.

|        | BREAKFAST  | Snack | LUNCH | Snack | DINNER | Snack | PHYSICAL ACTIVITY                                                                                                                                                                                |
|--------|------------|-------|-------|-------|--------|-------|--------------------------------------------------------------------------------------------------------------------------------------------------------------------------------------------------|
| MONDAY | 30+65<br>5 |       |       |       |        |       | <input type="checkbox"/> None<br><input type="checkbox"/> Walk<br><input type="checkbox"/> Housework<br><input type="checkbox"/> Training<br><input type="checkbox"/> Other (specify what) _____ |

At lunch he had a plate of lentils (without pasta) seasoned with raw extra-virgin olive oil, a cod, a plate of raw unseasoned vegetables and he drank two glasses of wine and a glass of natural water.

|        | BREAKFAST | Snack | LUNCH                             | Snack | DINNER | Snack | PHYSICAL ACTIVITY                                                                                                                                                                                |
|--------|-----------|-------|-----------------------------------|-------|--------|-------|--------------------------------------------------------------------------------------------------------------------------------------------------------------------------------------------------|
| MONDAY |           |       | 45 + 28<br>43, 1<br>49 + 49<br>52 |       |        |       | <input type="checkbox"/> None<br><input type="checkbox"/> Walk<br><input type="checkbox"/> Housework<br><input type="checkbox"/> Training<br><input type="checkbox"/> Other (specify what) _____ |

In the afternoon he had an apple and drank a coffee without sugar.

|        | BREAKFAST | Snack | LUNCH | Snack   | DINNER | Snack | PHYSICAL ACTIVITY                                                                                                                                                                                |
|--------|-----------|-------|-------|---------|--------|-------|--------------------------------------------------------------------------------------------------------------------------------------------------------------------------------------------------|
| MONDAY |           |       |       | 5<br>65 |        |       | <input type="checkbox"/> None<br><input type="checkbox"/> Walk<br><input type="checkbox"/> Housework<br><input type="checkbox"/> Training<br><input type="checkbox"/> Other (specify what) _____ |

At dinner he had a plate of minestrone soup with pasta and seasoned with raw extra-virgin olive oil, a slice of whole bread, a pear and drank two glasses of natural water.

|        | BREAKFAST    | Snack | LUNCH                             | Snack   | DINNER                                   | Snack | PHYSICAL ACTIVITY                                                                                                                                                                                           |
|--------|--------------|-------|-----------------------------------|---------|------------------------------------------|-------|-------------------------------------------------------------------------------------------------------------------------------------------------------------------------------------------------------------|
| MONDAY | 30 + 65<br>5 |       | 45 + 28<br>43, 1<br>49 + 49<br>52 | 5<br>65 | Minestrone soup<br>+ 28<br>22<br>52 + 52 |       | <input type="checkbox"/> None<br><input checked="" type="checkbox"/> Walk<br><input type="checkbox"/> Housework<br><input type="checkbox"/> Training<br><input type="checkbox"/> Other (specify what) _____ |

In the last column, referred to the physical activity carried out during the day, he put a cross in correspondence to the entry "walk".



SURNAME \_\_\_\_\_ LAST NAME \_\_\_\_\_ CODE \_\_\_\_\_  
 MONTH \_\_\_\_\_ WEEK from \_\_\_\_\_ to \_\_\_\_\_

|           | BREAKFAST | Snack | LUNCH | Snack | DINNER | Snack | PHYSICAL ACTIVITY                                                                                                                                                                                |
|-----------|-----------|-------|-------|-------|--------|-------|--------------------------------------------------------------------------------------------------------------------------------------------------------------------------------------------------|
| Monday    |           |       |       |       |        |       | <input type="checkbox"/> None<br><input type="checkbox"/> Walk<br><input type="checkbox"/> Housework<br><input type="checkbox"/> Training<br><input type="checkbox"/> Other (specify what) _____ |
| Tuesday   |           |       |       |       |        |       | <input type="checkbox"/> None<br><input type="checkbox"/> Walk<br><input type="checkbox"/> Housework<br><input type="checkbox"/> Training<br><input type="checkbox"/> Other (specify what) _____ |
| Wednesday |           |       |       |       |        |       | <input type="checkbox"/> None<br><input type="checkbox"/> Walk<br><input type="checkbox"/> Housework<br><input type="checkbox"/> Training<br><input type="checkbox"/> Other (specify what) _____ |
| Thursday  |           |       |       |       |        |       | <input type="checkbox"/> None<br><input type="checkbox"/> Walk<br><input type="checkbox"/> Housework<br><input type="checkbox"/> Training<br><input type="checkbox"/> Other (specify what) _____ |
| Friday    |           |       |       |       |        |       | <input type="checkbox"/> None<br><input type="checkbox"/> Walk<br><input type="checkbox"/> Housework<br><input type="checkbox"/> Training<br><input type="checkbox"/> Other (specify what) _____ |
| Saturday  |           |       |       |       |        |       | <input type="checkbox"/> None<br><input type="checkbox"/> Walk<br><input type="checkbox"/> Housework<br><input type="checkbox"/> Training<br><input type="checkbox"/> Other (specify what) _____ |
| Sunday    |           |       |       |       |        |       | <input type="checkbox"/> None<br><input type="checkbox"/> Walk<br><input type="checkbox"/> Housework<br><input type="checkbox"/> Training<br><input type="checkbox"/> Other (specify what) _____ |

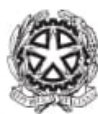

Ministry of  
Health

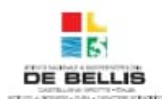

Research Laboratories  
 I.R.C.C.S. "Saverio De Bellis"  
 Castellana Grotte (BA)  
 tel. + 39 - 080 4994650 / 651



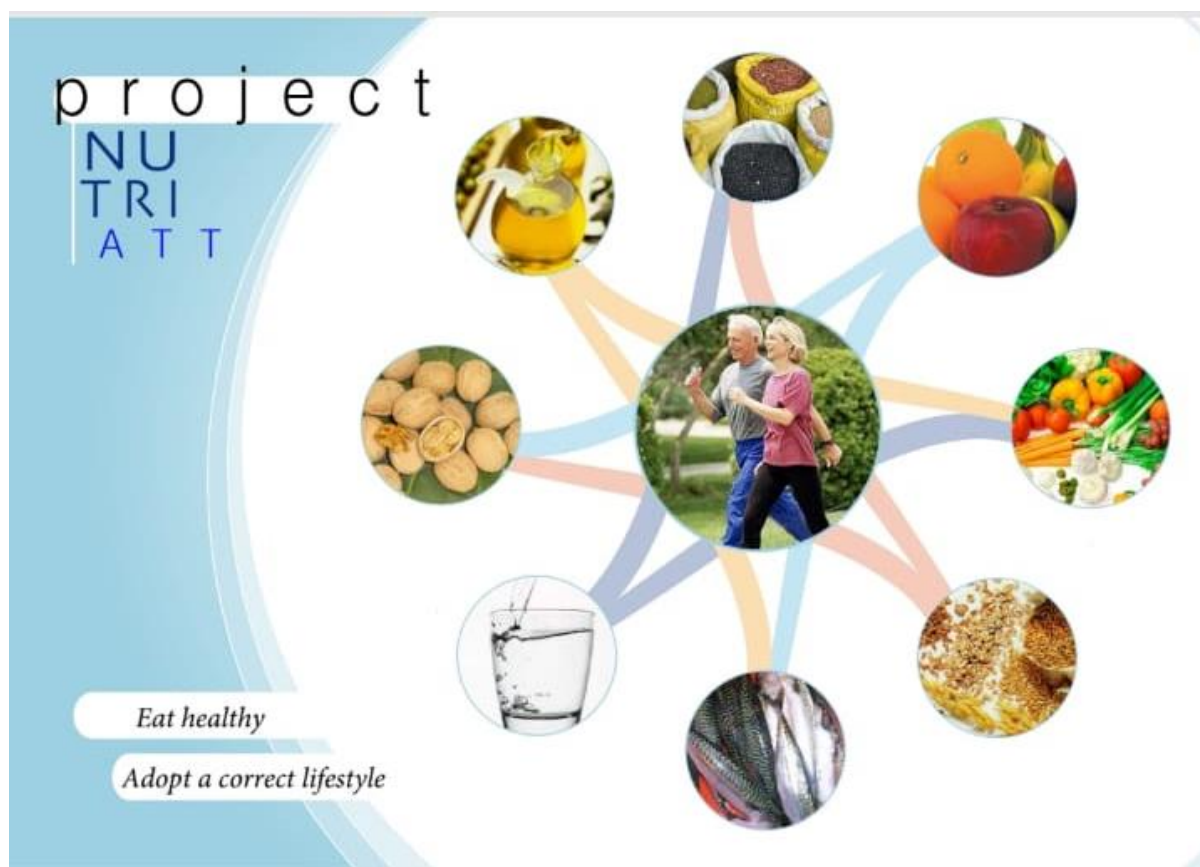

## Introduction

Your health is in your hands; you build it each day when you go to the supermarket and choose one food rather than another one, when you cook a lunch or a dinner. In these moments you do dietary choices which influence your health. A wrong diet can determine the appearance of risk factors for cardiovascular diseases and cancer. One of the steps of these diseases is the Non-alcoholic Fatty Liver Disease (NAFLD) (fat liver).

We found that your clinical, laboratory and instrumental data, which came from the NutriEP study you participate in, evidenced that you have NAFLD and then you are at a greater risk to develop cardiovascular disease or tumors (the principal causes of death in Western World).

The Laboratory of Epidemiology and Biostatistics of the IRCCS Saverio de Bellis from Castellana Grotte (Bari) has started up the research project "NutriEpa: EFFECT OF A LOW GLYCEMIC INDEX MEDITERRANEAN DIET ON NON ALCOHOLIC FATTY LIVER DISEASE. A RANDOMIZED CONTROLLED CLINICAL TRIAL" to evaluate the efficacy of the best diet to treat NAFLD.

So, we invite you to participate in this project which will help us to understand the efficacy of the diet to treat NAFLD. Dietary advices described in the following pages are those recommended by the World Health Organization (WHO) and we ask you to follow them. Furthermore we ask you to record your daily diet in this dietary record as long as the duration of the study. This will permit us to measure adherence level to the diet we gave you.

# WATCH THE SEMAPHORE!

## CHECK YOUR DIETARY CHOICES

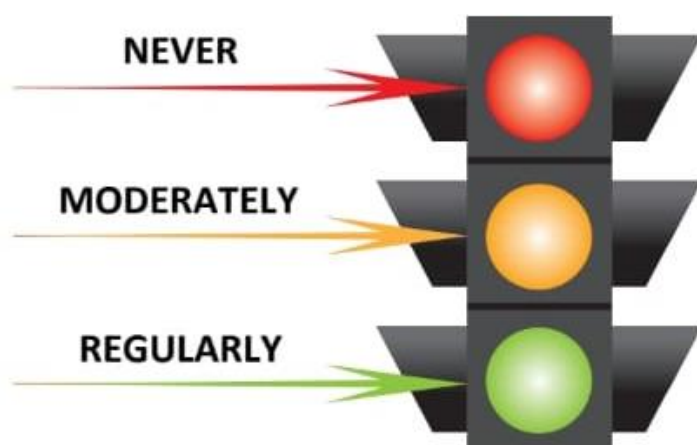

Foods choice and the frequency of their consumption is fundamental to set a correct dietary program, which day after day should be followed by everyone to keep a satisfying state of health. To direct foods choice towards those which best represent the indications of the **World Health Organization (WHO)** we marked with **GREEN** colour the foods to consume regularly, with **YELLOW** those to consume moderately and with **RED** those to avoid completely.

| REGULARLY                                                                              | MODERATELY max                                                                | NEVER                                                                   |
|----------------------------------------------------------------------------------------|-------------------------------------------------------------------------------|-------------------------------------------------------------------------|
| 1- Raw vegetables (lettuce, tomatoes, cucumbers, celery, carrots, radishes, etc)       | 30- Milk and yogurt                                                           | 51- Alcoholic beverages and spirits (brandy, grappa, liqueurs, whiskey) |
| 2- Steamed or boiled vegetables (beets, turnips, chicory, cauliflower, broccoli, etc.) | 32- Dairy products (cheese, smoked cheese, cottage cheese)                    | 24- French fries                                                        |
| 45- Dried pulses (lentils, chickpeas, beans, broad beans, soybeans)                    | 31- Cheese (parmigiano, cheese, etc.)                                         | 67- Fry                                                                 |
| 46- Own fresh vegetables (peas, beans, green beans)                                    | 33- Eggs                                                                      | 68- Sausages and bacon                                                  |
| 10- Pasta                                                                              | 35- Red meat (beef, veal, pork, horse)                                        | 29- Butter, margarine, mayonnaise, cream                                |
| 16- Rice                                                                               | 37- Stew                                                                      | 69- High-fat cheeses (mascarpone, gorgonzola, cream cheese)             |
| 23- Potatoes                                                                           | 38- Sausages (raw or cooked ham, dried beef, bacon, salami, mortadella, etc.) | 9- Fruit in syrup and candied sugar                                     |
| 27- Tomato sauce                                                                       | 47- Pizza                                                                     | 58- Croissants, pastries and snacks                                     |
| 28- Extra virgin olive oil (raw)                                                       | 6- Sweet dried fruit (dried figs, dried dates, prunes, raisins)               | 60- Candies and chocolates                                              |
| 20- White bread                                                                        | 50- Non carbonated soft drinks (orange juice, coca-cola, fruit juice, etc.)   |                                                                         |
| 53- Crackers, pretzels, bread sticks, bread and breakfast cereals                      | 48- Beer                                                                      |                                                                         |
| 34- White meat (chicken, turkey, rabbit)                                               | 49- Wine                                                                      |                                                                         |
| 39- Fish                                                                               | 61- Jams                                                                      |                                                                         |
| 40- Molluscs and crustaceans                                                           | 59- Ice-cream and water ice                                                   |                                                                         |
| 44- Canned tuna                                                                        | 57- Cakes, sweets, pastries                                                   |                                                                         |
| 3- Fresh fruit (apples, pears, oranges, grapefruit, kiwi, peaches, etc.)               |                                                                               |                                                                         |
| 54- Dry biscuits, toast                                                                |                                                                               |                                                                         |
| 64- Coffee                                                                             |                                                                               |                                                                         |
| 52- Natural water                                                                      |                                                                               |                                                                         |

## Your Dietary Record

### Instructions

- It's fundamental to complete the Dietary Record each day immediately after the meal or as soon as possible.
- The Dietary Record is composed of a series of pages, one for each week. In each weekly page, days from Monday to Sunday are divided in breakfast, lunch, dinner and snack.
- Record all the foods you eat and what you drink during the day (Sunday and holidays included).
- Registration consists in taking note, in correspondence to the meal, the identification number of the food/drink or of the food group consumed belonging to the list we enclosed. If the food you ate isn't included in the list, just write its name in the place reserved to the corresponding meal.

### Example:

Here below it is shown an hypothetical day of Mr Rossi's Dietary Record.

After each meal Mr Rossi registered what he ate and drank, so he wrote in the box of the specific meal the corresponding number of the food he consumed (by checking the foods list).

At breakfast he drank a cup of milk and coffee with a teaspoon of sugar and he ate an apple.

|        | BREAKFAST         | Snack | LUNCH | Snack | DINNER | Snack | PHYSICAL ACTIVITY                                                                                                                                                                                |
|--------|-------------------|-------|-------|-------|--------|-------|--------------------------------------------------------------------------------------------------------------------------------------------------------------------------------------------------|
| MONDAY | 30 + 64 + 63<br>3 |       |       |       |        |       | <input type="checkbox"/> None<br><input type="checkbox"/> Walk<br><input type="checkbox"/> Housework<br><input type="checkbox"/> Training<br><input type="checkbox"/> Other (specify what) _____ |

At lunch he had a plate of lentils (without pasta) seasoned with raw extra-virgin olive oil, a cod, a plate of raw unseasoned vegetables and he drank two glasses of wine and a glass of natural water.

|        | BREAKFAST | Snack | LUNCH                             | Snack | DINNER | Snack | PHYSICAL ACTIVITY                                                                                                                                                                                |
|--------|-----------|-------|-----------------------------------|-------|--------|-------|--------------------------------------------------------------------------------------------------------------------------------------------------------------------------------------------------|
| MONDAY |           |       | 45 + 28<br>39, 1<br>49 + 49<br>52 |       |        |       | <input type="checkbox"/> None<br><input type="checkbox"/> Walk<br><input type="checkbox"/> Housework<br><input type="checkbox"/> Training<br><input type="checkbox"/> Other (specify what) _____ |

In the afternoon he had an apple and drank a coffee with a teaspoon of sugar.

|        | BREAKFAST | Snack | LUNCH | Snack        | DINNER | Snack | PHYSICAL ACTIVITY                                                                                                                                                                                |
|--------|-----------|-------|-------|--------------|--------|-------|--------------------------------------------------------------------------------------------------------------------------------------------------------------------------------------------------|
| MONDAY |           |       |       | 3<br>64 + 63 |        |       | <input type="checkbox"/> None<br><input type="checkbox"/> Walk<br><input type="checkbox"/> Housework<br><input type="checkbox"/> Training<br><input type="checkbox"/> Other (specify what) _____ |

At dinner he had a plate of minestrone soup (without pasta) seasoned with raw extra-virgin olive oil, a slice of whole bread, a pear and drank two glasses of natural water.

|        | BREAKFAST     | Snack | LUNCH                             | Snack        | DINNER                                            | Snack | PHYSICAL ACTIVITY                                                                                                                                                                                           |
|--------|---------------|-------|-----------------------------------|--------------|---------------------------------------------------|-------|-------------------------------------------------------------------------------------------------------------------------------------------------------------------------------------------------------------|
| MONDAY | 30+64+63<br>3 |       | 45 + 28<br>39, 1<br>49 + 49<br>52 | 3<br>64 + 63 | Minestrone soup+28<br>Whole bread<br>3<br>52 + 52 |       | <input type="checkbox"/> None<br><input checked="" type="checkbox"/> Walk<br><input type="checkbox"/> Housework<br><input type="checkbox"/> Training<br><input type="checkbox"/> Other (specify what) _____ |

In the last column, referred to the physical activity carried out during the day, he put a cross in correspondence to the entry "walk".

SURNAME \_\_\_\_\_ LAST NAME \_\_\_\_\_ CODE \_\_\_\_\_  
 MONTH \_\_\_\_\_ WEEK from \_\_\_\_\_ to \_\_\_\_\_

|           | BREAKFAST | Snack | LUNCH | Snack | DINNER | Snack | PHYSICAL ACTIVITY                                                                                                                                                                                |
|-----------|-----------|-------|-------|-------|--------|-------|--------------------------------------------------------------------------------------------------------------------------------------------------------------------------------------------------|
| Monday    |           |       |       |       |        |       | <input type="checkbox"/> None<br><input type="checkbox"/> Walk<br><input type="checkbox"/> Housework<br><input type="checkbox"/> Training<br><input type="checkbox"/> Other (specify what) _____ |
| Tuesday   |           |       |       |       |        |       | <input type="checkbox"/> None<br><input type="checkbox"/> Walk<br><input type="checkbox"/> Housework<br><input type="checkbox"/> Training<br><input type="checkbox"/> Other (specify what) _____ |
| Wednesday |           |       |       |       |        |       | <input type="checkbox"/> None<br><input type="checkbox"/> Walk<br><input type="checkbox"/> Housework<br><input type="checkbox"/> Training<br><input type="checkbox"/> Other (specify what) _____ |
| Thursday  |           |       |       |       |        |       | <input type="checkbox"/> None<br><input type="checkbox"/> Walk<br><input type="checkbox"/> Housework<br><input type="checkbox"/> Training<br><input type="checkbox"/> Other (specify what) _____ |
| Friday    |           |       |       |       |        |       | <input type="checkbox"/> None<br><input type="checkbox"/> Walk<br><input type="checkbox"/> Housework<br><input type="checkbox"/> Training<br><input type="checkbox"/> Other (specify what) _____ |
| Saturday  |           |       |       |       |        |       | <input type="checkbox"/> None<br><input type="checkbox"/> Walk<br><input type="checkbox"/> Housework<br><input type="checkbox"/> Training<br><input type="checkbox"/> Other (specify what) _____ |
| Sunday    |           |       |       |       |        |       | <input type="checkbox"/> None<br><input type="checkbox"/> Walk<br><input type="checkbox"/> Housework<br><input type="checkbox"/> Training<br><input type="checkbox"/> Other (specify what) _____ |

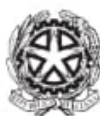

Ministry of  
Health

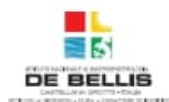

Research Laboratories  
 I.R.C.C.S. "Saverio De Bellis"  
 Castellana Grotte (BA)  
 tel. + 39 - 080 4994650 / 651
